# Supplementary material
Source: PubMed Central journal article supplement (PMC5600854)
Supplement: NIHMS894675-supplement-1.pdf [file NIHMS894675-supplement-1.pdf]

Supplemental tables:

| Super Pathway          | Sub Pathway                            |                                                                  | Biochemical Name                                                          | Fold change                       |
|------------------------|----------------------------------------|------------------------------------------------------------------|---------------------------------------------------------------------------|-----------------------------------|
|                        |                                        |                                                                  | Two-Way ANOVA Contrasts                                                   | Welch's Two-Sample <i>t</i> -Test |
|                        |                                        |                                                                  | <u>MEF <i>Nf2</i><sup>-/-</sup></u><br><u>MEF <i>Nf2</i><sup>ff</sup></u> | <u>FH912</u><br><u>FC912</u>      |
| Vitamins and Cofactors | Nicotinate and Nicotinamide Metabolism | nicotinamide adenine dinucleotide (NAD <sup>+</sup> )            | <u>1.61</u>                                                               | <u>4.55</u>                       |
|                        |                                        | nicotinamide adenine dinucleotide reduced (NADH)                 | <u>1.34</u>                                                               | <u>3.79</u>                       |
|                        |                                        | nicotinamide adenine dinucleotide phosphate (NADP <sup>+</sup> ) | 1.22                                                                      | <u>6.09</u>                       |
|                        |                                        | adenosine 5'diphosphoribose                                      | 0.29                                                                      | 1.08                              |
|                        | Riboflavin Metabolism                  | riboflavin (Vitamin B2)                                          | 0.95                                                                      | <u>1.3</u>                        |
|                        |                                        | flavin adenine dinucleotide                                      | <u>0.81</u>                                                               | <u>0.76</u>                       |
|                        | Pantothenate and CoA Metabolism        | pantothenate                                                     | <u>1.11</u>                                                               | <u>2.1</u>                        |
|                        |                                        | phosphopantetheine                                               | <u>2.01</u>                                                               | <u>5.81</u>                       |
|                        |                                        | coenzyme A                                                       | <u>3</u>                                                                  | <u>0.54</u>                       |
|                        | Ascorbate Metabolism                   | gulono-1,4-lactone                                               | <u>2.04</u>                                                               | <u>5.06</u>                       |
|                        | Tocopherol Metabolism                  | alpha-tocopherol                                                 | <u>0.65</u>                                                               | 1                                 |
|                        | Folate Metabolism                      | 5-methyltetrahydrofolate                                         | 1.03                                                                      | <u>1.59</u>                       |
|                        | Hemoglobin Metabolism                  | bilirubin (Z,Z)                                                  | 1                                                                         | 1.46                              |
|                        | Thiamine Metabolism                    | thiamin (Vitamin B1)                                             | <u>1.54</u>                                                               | 0.91                              |
|                        |                                        | thiamin diphosphate                                              | <u>0.41</u>                                                               | 0.74                              |
|                        | Vitamin B6 Metabolism                  | pyridoxine (Vitamin B6)                                          | 1                                                                         | <u>0.5</u>                        |
|                        |                                        | pyridoxal                                                        | <u>0.68</u>                                                               | 1.16                              |

**Table S1. Elevated levels of vitamins and cofactors in *Nf2*-deficient cell lines.**

Samples were processed and analyzed as in Table 1.

| Super Pathway     | Sub Pathway                                      | Biochemical Name              | Two-Way ANOVA Contrasts                                                   | Welch's Two-Sample <i>t</i> -Test |
|-------------------|--------------------------------------------------|-------------------------------|---------------------------------------------------------------------------|-----------------------------------|
|                   |                                                  |                               | <u>MEF <i>Nf2</i><sup>-/-</sup></u><br><u>MEF <i>Nf2</i><sup>ff</sup></u> | <u>FH912</u><br><u>FC912</u>      |
| <b>Aminoacids</b> | Glycine, Serine and Threonine Metabolism         | glycine                       | 0.92                                                                      | <b><u>0.86</u></b>                |
|                   |                                                  | serine                        | <b><u>0.75</u></b>                                                        | 0.93                              |
|                   |                                                  | threonine                     | <b><u>0.82</u></b>                                                        | <b><u>0.77</u></b>                |
|                   |                                                  | N-acetylthreonine             | <b><u>0.87</u></b>                                                        | 1.12                              |
|                   | Alanine and Aspartate Metabolism                 | aspartate                     | 1.01                                                                      | <b><u>0.77</u></b>                |
|                   |                                                  | asparagine                    | <b><u>0.49</u></b>                                                        | 1.4                               |
|                   | Glutamate Metabolism                             | glutamate                     | <b><u>1.4</u></b>                                                         | 0.98                              |
|                   |                                                  | glutamine                     | <b><u>0.37</u></b>                                                        | <b><u>0.85</u></b>                |
|                   |                                                  | N-acetylglutamate             | 0.72                                                                      | <b><u>4.8</u></b>                 |
|                   |                                                  | glutamate, gamma-methyl ester | <b><u>1.57</u></b>                                                        | <b><u>0.65</u></b>                |
|                   | Histidine Metabolism                             | histidine                     | <b><u>0.75</u></b>                                                        | 1.08                              |
|                   | Lysine Metabolism                                | lysine                        | <b><u>0.8</u></b>                                                         | <b><u>0.64</u></b>                |
|                   |                                                  | N6-acetyllysine               | <b><u>0.34</u></b>                                                        | 0.96                              |
|                   |                                                  | 2-aminoadipate                | <b><u>0.56</u></b>                                                        | <b><u>0.65</u></b>                |
|                   | Phenylalanine and Tyrosine Metabolism            | phenylalanine                 | <b><u>0.76</u></b>                                                        | 0.99                              |
|                   |                                                  | phenylacetylglucine           | <b><u>0.23</u></b>                                                        | 1                                 |
|                   |                                                  | tyrosine                      | <b><u>0.67</u></b>                                                        | 1.18                              |
|                   | Tryptophan Metabolism                            | tryptophan                    | <b><u>0.69</u></b>                                                        | 0.97                              |
|                   |                                                  | C-glycosyltryptophan*         | <b><u>0.79</u></b>                                                        | <b><u>0.75</u></b>                |
|                   | Leucine, Isoleucine and Valine Metabolism        | leucine                       | <b><u>0.83</u></b>                                                        | <b><u>0.81</u></b>                |
|                   |                                                  | 4-methyl-2-oxopentanoate      | 0.95                                                                      | <b><u>0.65</u></b>                |
|                   |                                                  | isovalerylcarnitine           | <b><u>0.28</u></b>                                                        | 1                                 |
|                   |                                                  | isoleucine                    | <b><u>0.74</u></b>                                                        | 1.12                              |
|                   |                                                  | valine                        | <b><u>0.6</u></b>                                                         | 1.09                              |
|                   | Methionine, Cysteine, SAM and Taurine Metabolism | methionine                    | <b><u>0.75</u></b>                                                        | 0.93                              |
|                   |                                                  | N-acetylmethionine            | <b><u>0.77</u></b>                                                        | 0.98                              |
| hypotaurine       |                                                  | <b><u>1.46</u></b>            | <b><u>0.38</u></b>                                                        |                                   |

**Table S2. Reduced amino acids levels in *Nf2*-deficient cell lines.** Samples were processed and analyzed as in Table 1.

| Super Pathway | Sub Pathway               | Biochemical Name | Fold change                                           |                                                                    |                                                                    |
|---------------|---------------------------|------------------|-------------------------------------------------------|--------------------------------------------------------------------|--------------------------------------------------------------------|
|               |                           |                  | Two-Way ANOVA Contrasts                               |                                                                    |                                                                    |
|               |                           |                  | $\frac{\text{MEF } Nf2^{-/-}}{\text{MEF } Nf2^{+/+}}$ | $\frac{\text{MEF } Nf2^{+/+} \text{ Ceru}}{\text{MEF } Nf2^{+/+}}$ | $\frac{\text{MEF } Nf2^{-/-} \text{ Ceru}}{\text{MEF } Nf2^{-/-}}$ |
| Energy        | TCA Cycle                 | citrate          | <u>1.47</u>                                           | <u>1.34</u>                                                        | 0.93                                                               |
|               |                           | succinate        | <u>2.62</u>                                           | <u>1.91</u>                                                        | 0.75                                                               |
|               |                           | fumarate         | <u>1.23</u>                                           | <u>1.44</u>                                                        | <u>1.17</u>                                                        |
|               |                           | malate           | <u>1.94</u>                                           | <u>1.8</u>                                                         | 1.03                                                               |
|               | Oxidative Phosphorylation | acetylphosphate  | <u>1.8</u>                                            | <u>1.67</u>                                                        | <u>0.33</u>                                                        |
|               |                           | pyrophosphate    | 0.81                                                  | 1.25                                                               | 0.63                                                               |
|               |                           | phosphate        | 1.01                                                  | <u>1.2</u>                                                         | 0.92                                                               |

**Table S3. Different response to cerulenin treatment in *Nf2*-deficient and control cell lines.** MEF *Nf2*<sup>+/+</sup> Ceru – WT MEFs treated with 5  $\mu$ M cerulenin for 24 hours prior to sample preparation, MEF *Nf2*<sup>-/-</sup> Ceru – *Nf2*-knockout MEFs treated with 5  $\mu$ M cerulenin for 24 hours prior to sample preparation. Samples were processed and analyzed as in Table 1.

### Supplemental Materials and Methods

#### List of qPCR primers:

*Actb* (potential normalizer) Fwd: CCAGCAGATTGTGATCAGCA;

Rev: CTTGCCGGTGCACGATGG

*Acaca* Fwd: TGACAGACTGATCGCAGAGAAAG;

Rev: TGGAGAGCCCCACACACA

*Acacb* Mm01204683\_m1

*Acl* Fwd: TGACAGACTGATCGCAGAGAAAG;

Rev: TGGAGAGCCCCACACACA

*Acs11* Fwd: GTACATAGCACCAGAAAAGATTGAAAAT;

Rev: GGTACCACA ACTATGAGAAAGG

*Acss2* Fwd: AGTCCCCACCAGTTAAGAGGC;

Rev: GTGTACAAGATGAAGAGTGGGTCCT

*Cpt1c* Fwd: GTGTTCCGCCCAGTATGAGAG;

Rev: GAGAGTGAGTCCCTACACGGAAG

*Cpt2* Fwd: ATATGATGGCTGAGTGCTCCA; Rev: AGAGCTCAGGCAGGGTGAC

*Fasn* (Taqman set) Mm00662319\_m1

*Lpin1* Mm00550511\_m1

*Mlycd* Fwd: CCGCTGCCATCTTCTACTCC; Rev: GATAGGCGACAGGCTTGAAAA

*Srebp1* Fwd: GGCCGAGATGTGCGAACT; Rev: TTGTTGATGAGCTGGAGCATGT

**Acyl-CoA quantification.** Acetyl-CoA, malonyl-CoA, and propionyl-CoA standards were individually prepared as 1 mM stock in water and stored at -80°C until use. All acyl-CoA standards were diluted in 50 mM ammonium formate:acetonitrile (30:70, v/v) to prepare a set of calibration standards. In addition, propionyl-CoA was chosen as the recovery standard (RS) <sup>2</sup>.

Cells were grown in 30 cm tissue culture dishes in complete media until confluent. 5 µM cerulenin was added to part of the cells 12 hours after plating and incubated for 24 hours. Cells were trypsinized, and cell pellets snap-frozen (dry ice – ethanol). Thawed pellets with RS added, ~1g per sample type, were pulse sonicated in 10% perchloric acid and neutralized with neutralization buffer (2 M KOH, 0.4 M KCl and 0.4 M imidazole),

and then centrifuged at 8,000 x g at 4°C for 20 min, in preparation for solid phase extraction (SPE).

SPE was conducted with a Waters Oasis HLB 3 cc extraction cartridge (WAT094226, Milford, MA). The acidified cell extracts (2% formic acid) from each sample were loaded on a SPE cartridge and eluted with 0.2 mL water, 0.2 mL methanol, and 3 mL methanol sequentially. The last 3 mL portion of eluates was collected and then was evaporated using a SpeedVac concentrator. The residuals were re-dissolved in 50 mM ammonium formate:acetonitrile (30:70, v/v).

A Waters Acquity H-class ultra-high performance liquid chromatography (UPLC, Milford, MA) was used to inject 10 µL of the processed samples or the calibration standards to an Acquity HSS T3 column (2.1 x 50 mm; particle size 1.8 µm) and to elute with the isocratic mobile phase, 50 mM ammonium formate:acetonitrile (30:70, v/v). All injected samples were eluted over 10 min at 0.4 mL/min at 30°C, and the eluates were directly introduced into the coupled mass spectrometer (MS) for quantitative analysis.

Quantitation was conducted by a Thermo triple quadrupole mass spectrometer (TSQ Quantum Access, Waltham, MA). The mass spectrometric conditions were set as the followings: electrospray voltage: +4 kV; sheath gas pressure: 45 psi; auxiliary gas pressure: 20 psi; ion sweep gas pressure: 2 psi; collision gas pressure: 1.5 mTorr; and capillary temperature: 380°C. Unit resolution was selected for ion scans<sup>3</sup>. Multiple reaction monitoring (MRM) was used to detect the elution of the target acyl-CoAs. The mass transitions for acetyl-CoA, malonyl-CoA, and propionyl-CoA are 810→303, 854→347, and 824→317, respectively<sup>1</sup>. The areas under individual resolved peaks were integrated using Xcalibur software (version 2.1, Thermo).

## Supplemental figure legends

### **Figure S1A. Immunoblot detection of reexpressed Merlin level in mouse**

**schwannoma cells.** SC4-9 cells were transfected with pBabe-Merlin-puro and pBabe-puro plasmids. Levels of Merlin were detected 24 hours after transfection.  $\beta$ -Actin was used for loading control.

### **Figure S1B. Immunoblot quantification of Casp3 cleavage caused by Fasn inhibition.**

Quantification performed using ImageJ software. Mean values and CI95 are shown on graphs. \*\*\*\* –  $p \leq 0.0001$ .

### **Figure S1C. Increased Casp3 cleavage in *Nf2<sup>-/-</sup>* MEFs transfected with anti-*Fasn***

**siRNA and treated with GSK2194069.** Cells were transfected by electroporation with anti-*Fasn* and scrambled (negative control) siRNAs, final concentration 100 nM, and plated into 6-well plates (250,000 cells/well). To compare the GSK2194069 effects to *Fasn* knockdown, cells transfected with non-silencing siRNA were treated with 0.5  $\mu$ M GSK2194069 for 12 hours before lysis. Lysates were analyzed by immunoblotting using rabbit anti-FASN and anti-cleaved Casp3 antibodies. Typical blots are shown. 1 – vehicle, 2 – GSK2194069, 3 – anti-*Fasn* siRNA *Fasn177858*, 4 – anti-*Fasn* siRNA *Fasn177854*

### **Figure S1D.**

### **Figure S2. Modulation of the effect of FASN inhibitors by genetic knockdown of acetyl-CoA carboxylase (ACC1) and malonyl-CoA (MCD) decarboxylase activity.**

A) Effect of *Acaca* knockdown on cerulenin toxicity. Cells were transfected by electroporation with anti-*Acaca* and scrambled (negative control) siRNAs. Indicated amounts of cerulenin were added in 24 hours and incubated for 48 hours. Parallel transfections for immunoblotting knockdown control were done in a 6-well format. Each

lysate type was run in duplicate for transfer consistency control. Experiments were done in quadruplicates and repeated 3 times. Mean values and 95% confidence intervals are shown on graphs. **B)** Effect of *Acaca* knockdown on GSK2194069 toxicity. Cells were transfected by electroporation with anti-*Acaca* and scrambled (negative control) siRNAs. Indicated amounts of cerulenin were added in 24 hours and incubated for 48 hours. Parallel transfections for immunoblotting knockdown control were done in a 6-well format. **C)** Effect of *Mlycd* knockdown on GSK2194069 toxicity. Cells were transfected by electroporation with anti-*Mlycd* and scrambled (negative control) siRNAs. Indicated amounts of cerulenin were added in 24 hours and incubated for 48 hours. Parallel transfections for knockdown control were done in a 6-well format. Experiments were done in quadruplicates and repeated 4 times. Mean values and 95% confidence intervals are shown on graphs.

**Figure S3. Quantification of immunoblot detection of levels of expression and phosphorylation of lipogenesis-related proteins in *Nf2<sup>-/-</sup>* and *Nf2<sup>fl/fl</sup>* MEFs.**

Experiments were repeated 4 times. ImageJ software was used for the band intensity quantification. Band intensities were normalized to beta-Actin band intensity. Mean values and 95% confidence intervals are shown on graphs. Statistical significance *p* was determined by Holm-Sidak *t*-test. \* –  $p \leq 0.05$ , \*\* –  $p \leq 0.01$ , \*\*\* –  $p \leq 0.001$ , \*\*\*\* –  $p \leq 0.0001$

**Figure S4. Quantification of immunoblot detection of levels of expression and phosphorylation of lipogenesis-related proteins in SC4-9 Babe and SC4-9 Merlin cells.** Data was processed as and analyzed as in Figure S1.

**Figure S5. Role of TORC1 in lipogenesis upregulation in *Nf2*<sup>-/-</sup> MEFs.** **A)** *Mtor* knockdown effect on FASN inhibition. Cells were transfected by electroporation with anti-*Mtor* and scrambled (negative control) siRNAs. Indicated amounts of GSK2194069 were added in 24 hours and incubated for 48 hours. **B)** *Rptor* knockdown effect on FASN inhibition. Cells were transfected by electroporation with *Rptor* and scrambled (negative control) siRNAs. Indicated amounts of GSK2194069 were added in 24 hours and incubated for 48 hours. All experiments were repeated 2 times, dose response curves were done in quadruplicates, and for WBs each lysate type was run in duplicates for transfer consistency control. Mean values and 95% confidence intervals are shown on graphs.

**Figure S6. Increased mitochondrial respiration in *Nf2*-deficient cells.** Oxygen consumption rate (OCR) was determined in *Nf2*<sup>-/-</sup> and *Nf2*<sup>fl/fl</sup> MEFs in a 96-well format on a Seahorse XF Metabolic Flux analyser using the Seahorse Mito Stress Kit (Seahorse Bioscience, N. Billerica, USA) according to the manufacturer's protocol. Initial cell density was four thousand cells/well. At time points a (20 min), b (50 min), and c (80 min), oligomycin (5  $\mu$ M), FCCP (1  $\mu$ M), and antimycin were added.



**Figure S7. Decreased levels of fatty acid beta-oxidation gene expression in *Nf2*-deficient cell lines.** RNA quantification was performed on *Nf2*<sup>-/-</sup> and *Nf2*<sup>ff/ff</sup> MEFs; SC4-9 Babe (SC4-9 cells transiently transfected with empty pBabe-puro plasmid); SC4-9 Merlin (SC4-9 cells transiently transfected with pBabe-Merlin plasmid); and *Nf2*<sup>-/-</sup> (FH912) and *Nf2*<sup>ff/ff</sup> (FC912) mouse Schwann cells. All experiments were repeated 2 times. Mean and 95% CI are shown on graphs. *Acadl* = acyl-CoA dehydrogenase, long chain; *Acadm* = acyl-CoA dehydrogenase, medium chain; *Acadls* = acyl-CoA dehydrogenase, short chain; *Acox1* = acyl-CoA oxydase 1; *Acox3* = acyl-CoA oxydase 3; *Acaal1* = acetyl-CoA acyltransferase 1; *Echs1* = enoyl CoA hydratase, short chain, 1, mitochondrial; *Hadh* = hydroxyacyl-CoA dehydrogenase.

## References

- 1 Gilibili RR, Kandaswamy M, Sharma K, Giri S, Rajagopal S, Mullangi R. Development and validation of a highly sensitive LC-MS/MS method for simultaneous quantitation of acetyl-CoA and malonyl-CoA in animal tissues. *Biomed Chromatogr* 2011; 25: 1352-1359.
- 2 Hayashi O, Satoh K. Determination of acetyl-CoA and malonyl-CoA in germinating rice seeds using the LC-MS/MS technique. *Biosci Biotechnol Biochem* 2006; 70: 2676-2681.
- 3 Kuo YM, Andrews AJ. Quantitating the specificity and selectivity of Gcn5-mediated acetylation of histone H3. *PLoS One* 2013; 8.

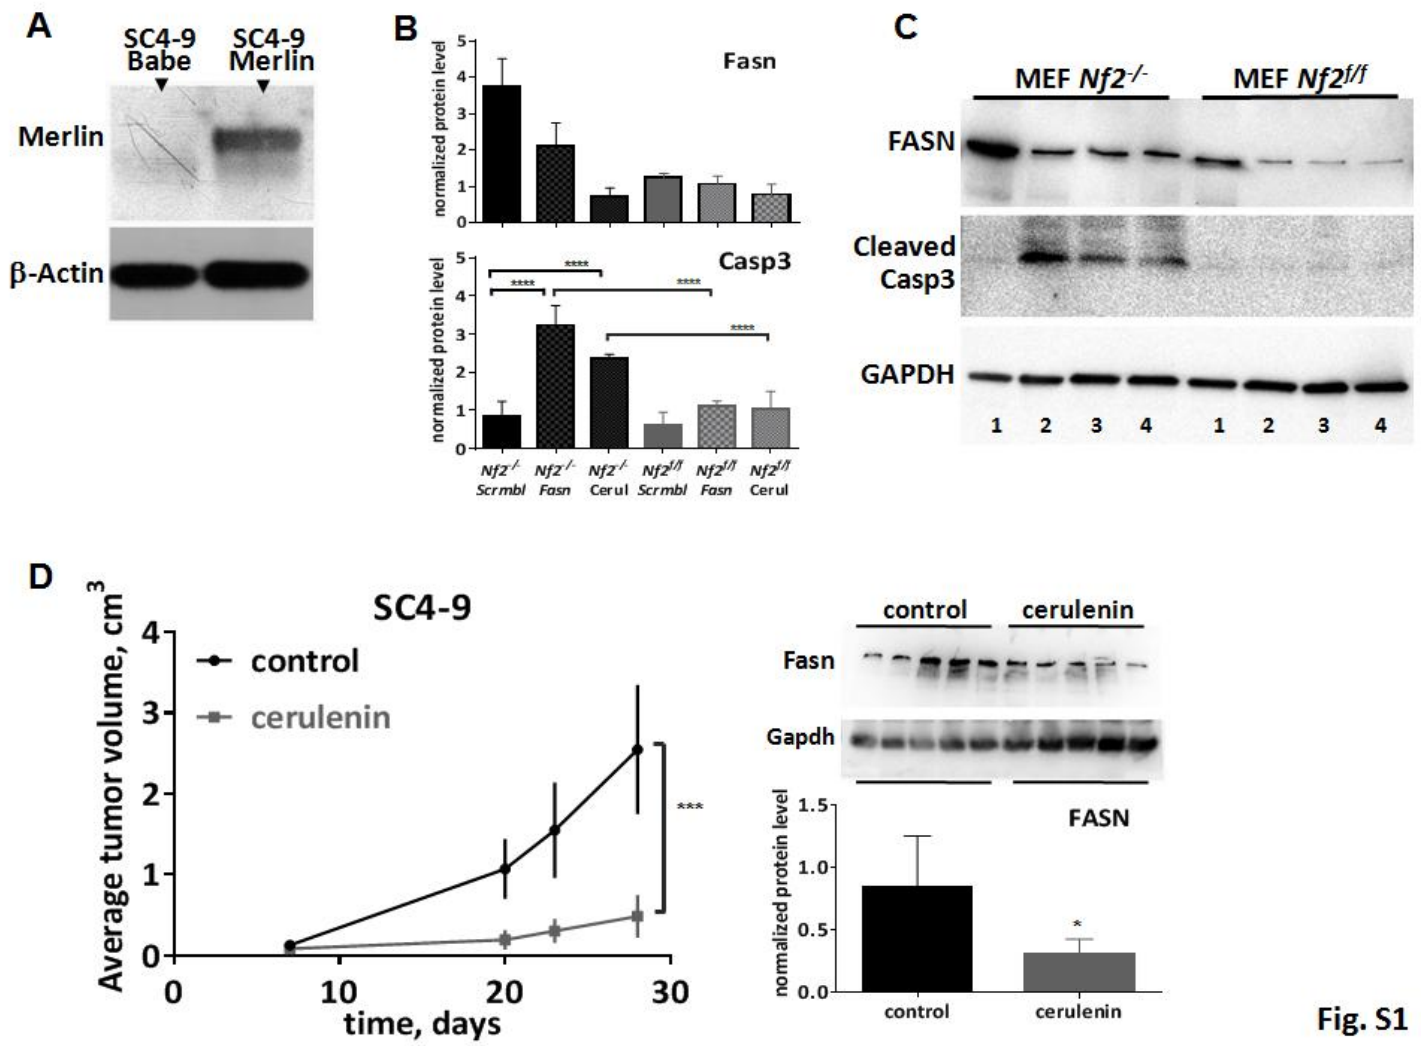

Fig. S1

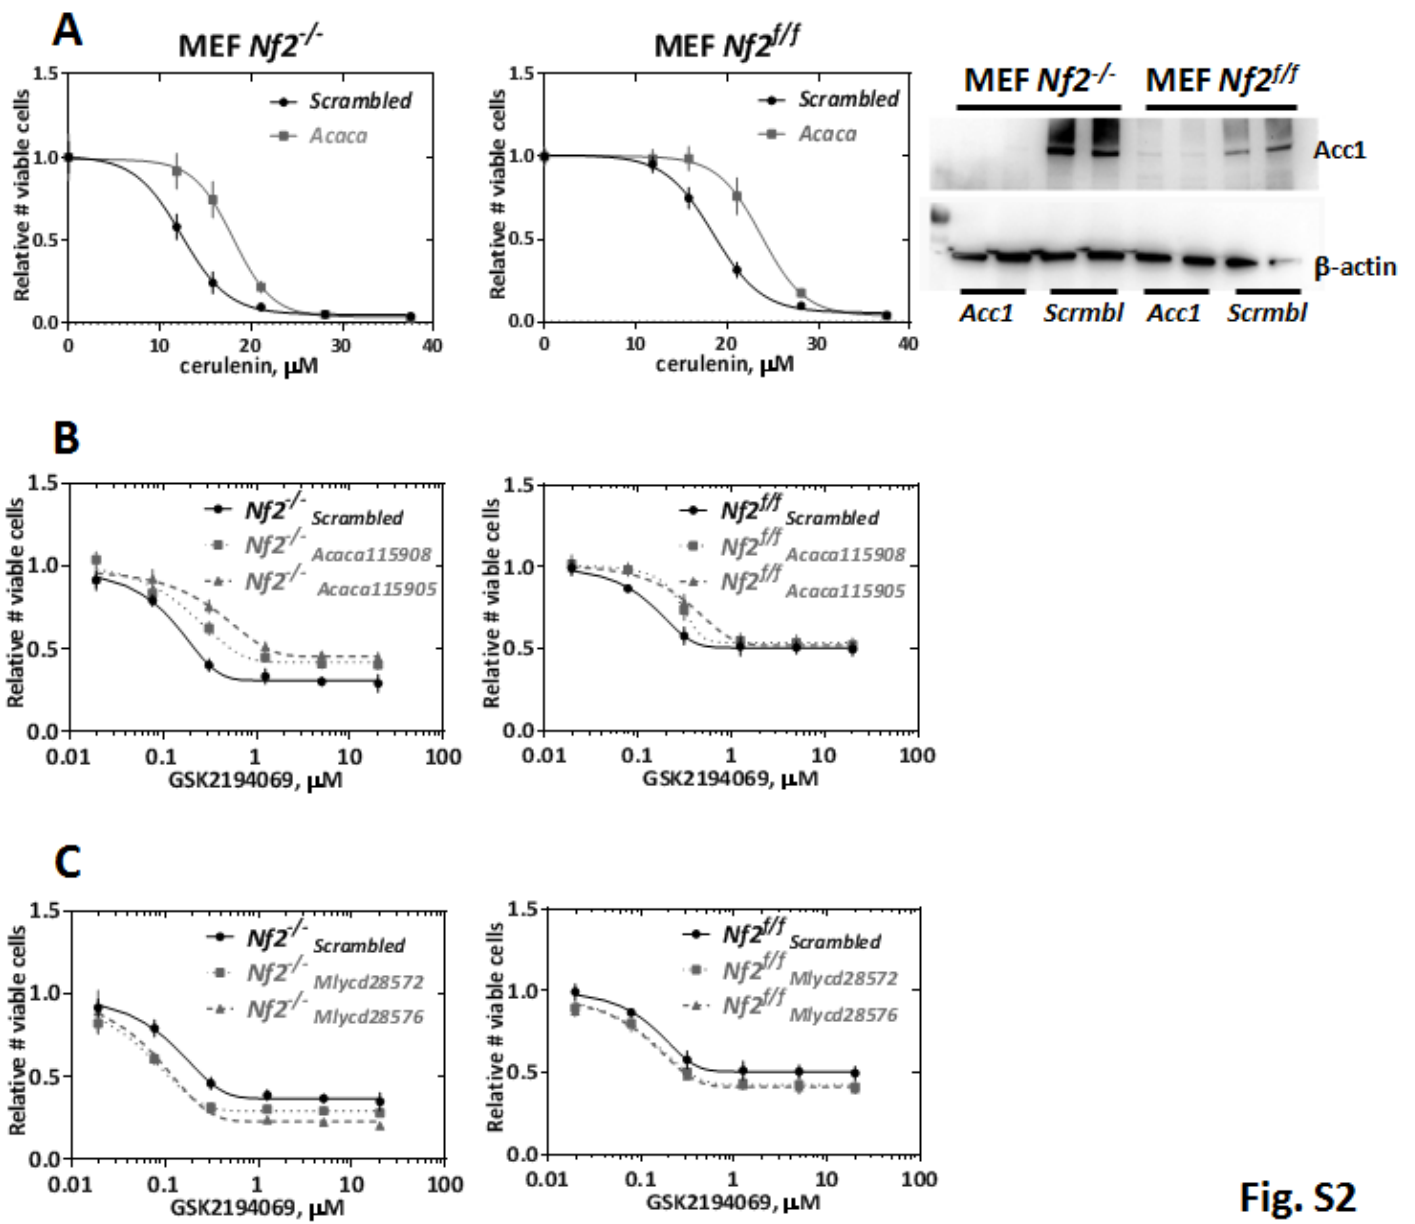

Fig. S2

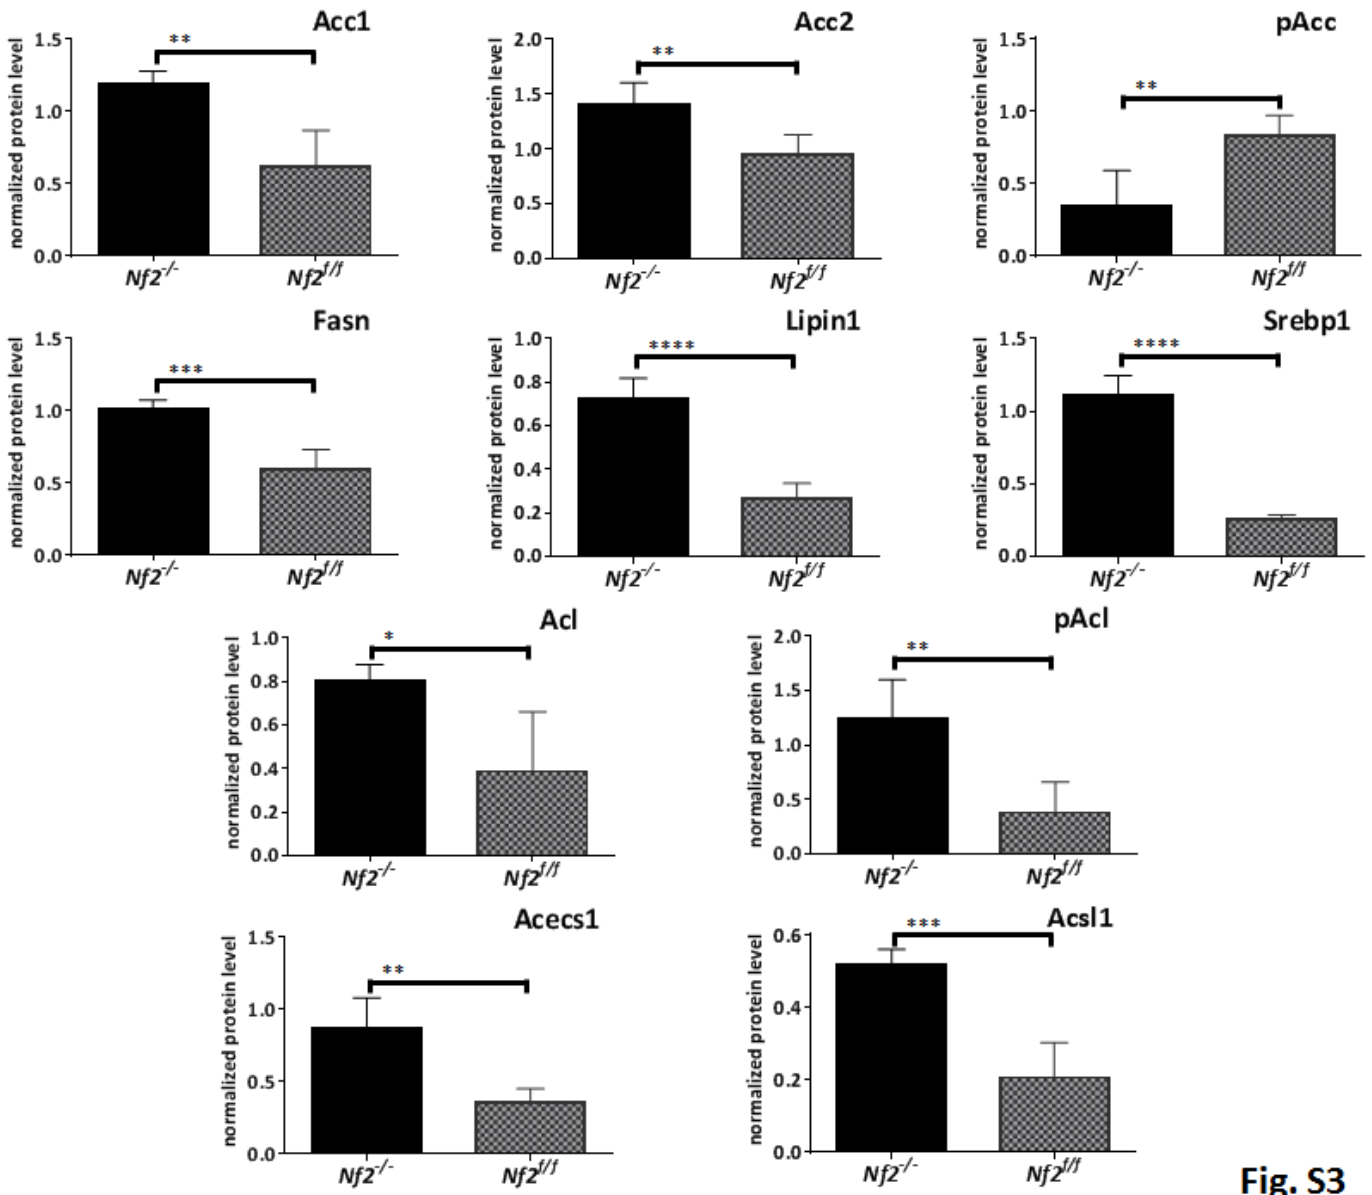

Fig. S3

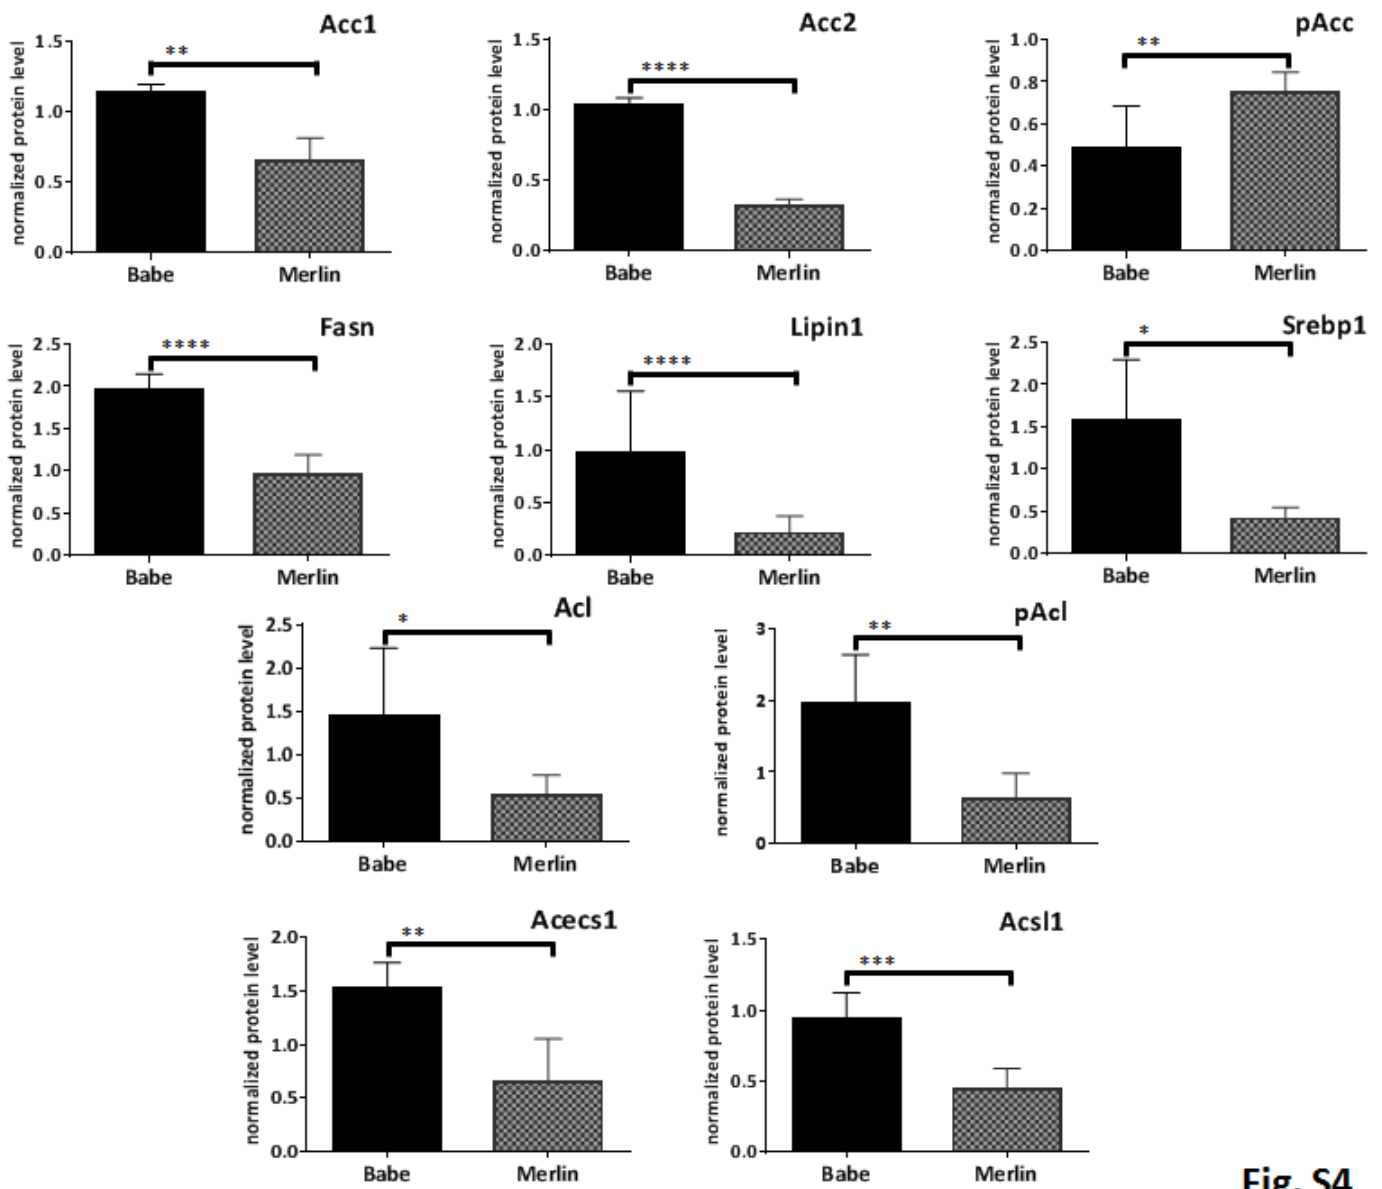

Fig. S4

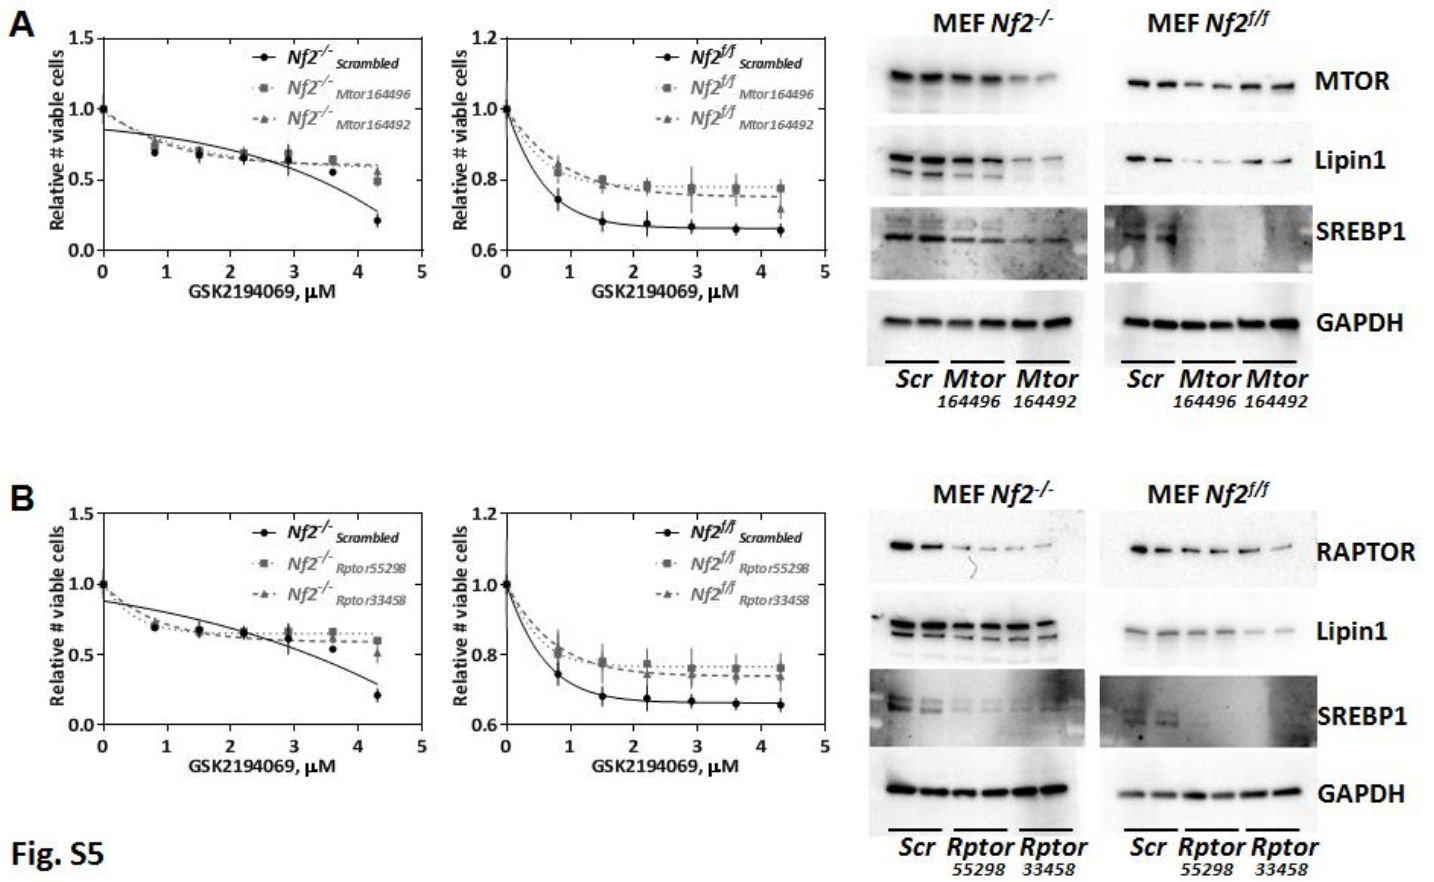

Fig. S5

### mitochondrial respiration

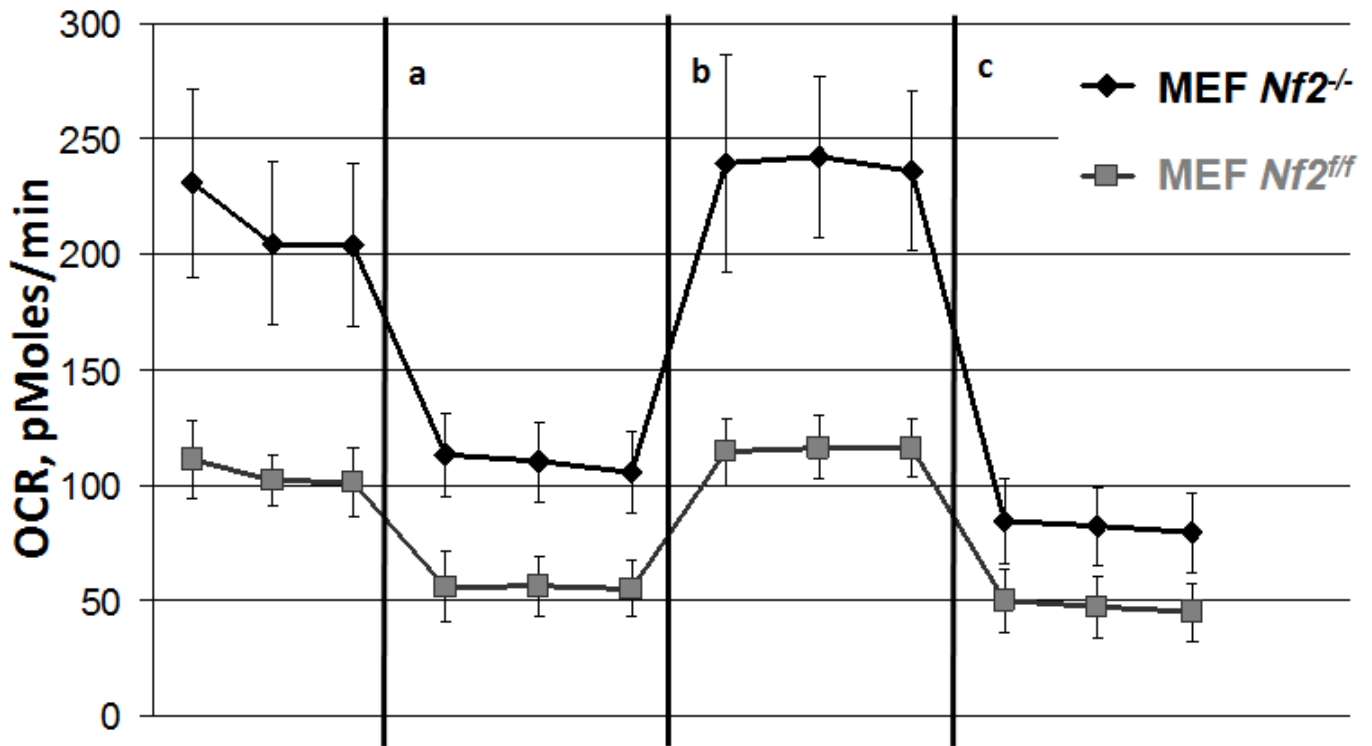

Fig. S6

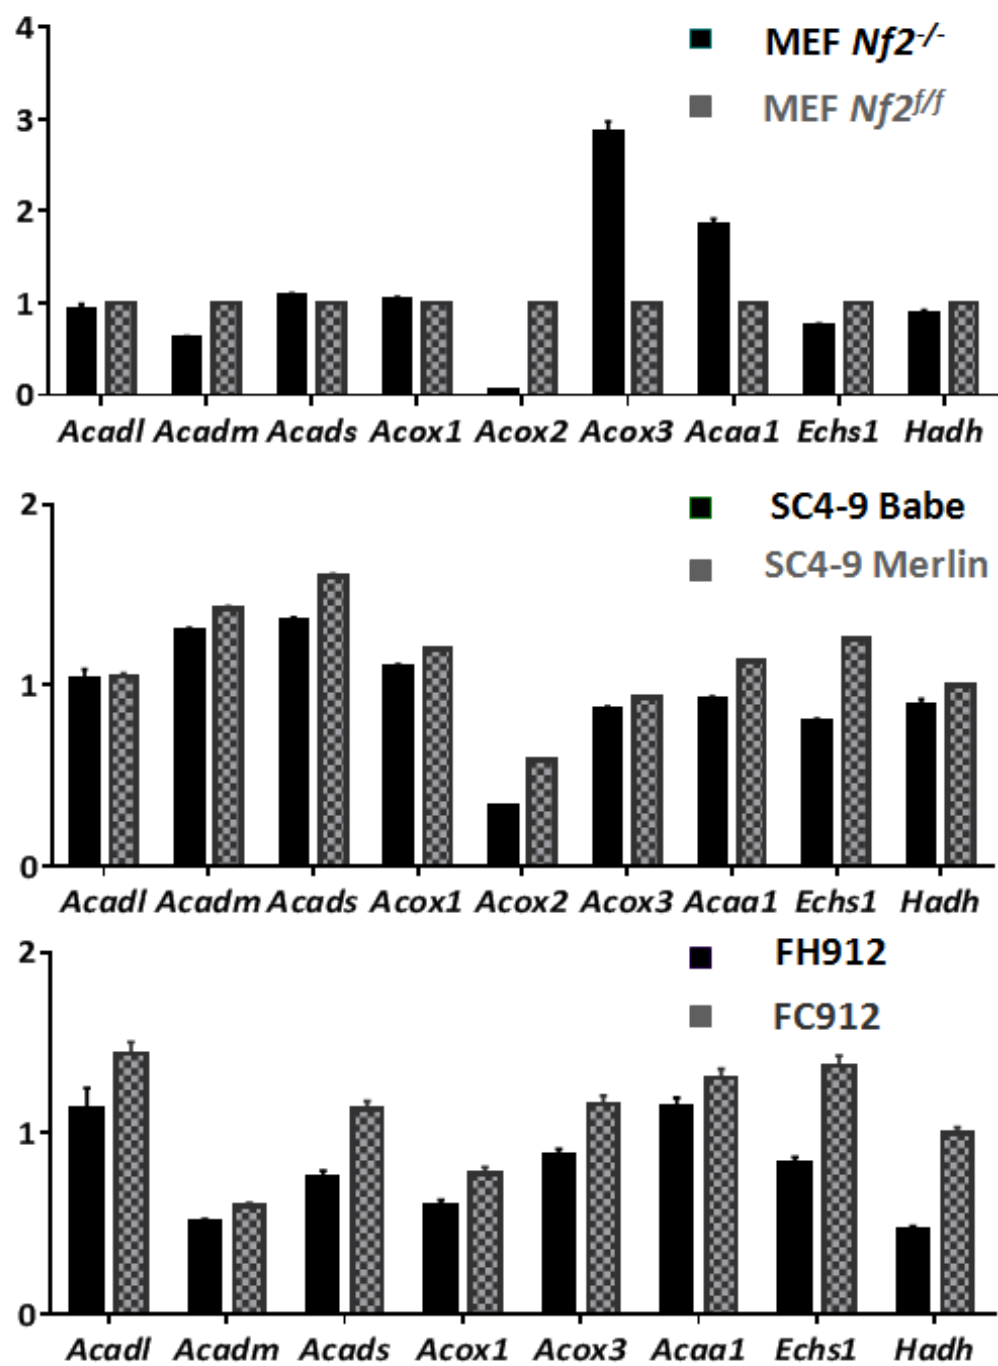

Fig. S7
